# Supplementary material for: Anuran genome size evolution is driven by relatively recent retrotransposon activity and by life history
Source: Research Square preprint supplement (doi:10.21203/rs.3.rs-6941224/v1), 2025-06-23
Supplement: Supplementary file [file 7dd0093463de0350b6598624.pdf]

## Supplementary Figures

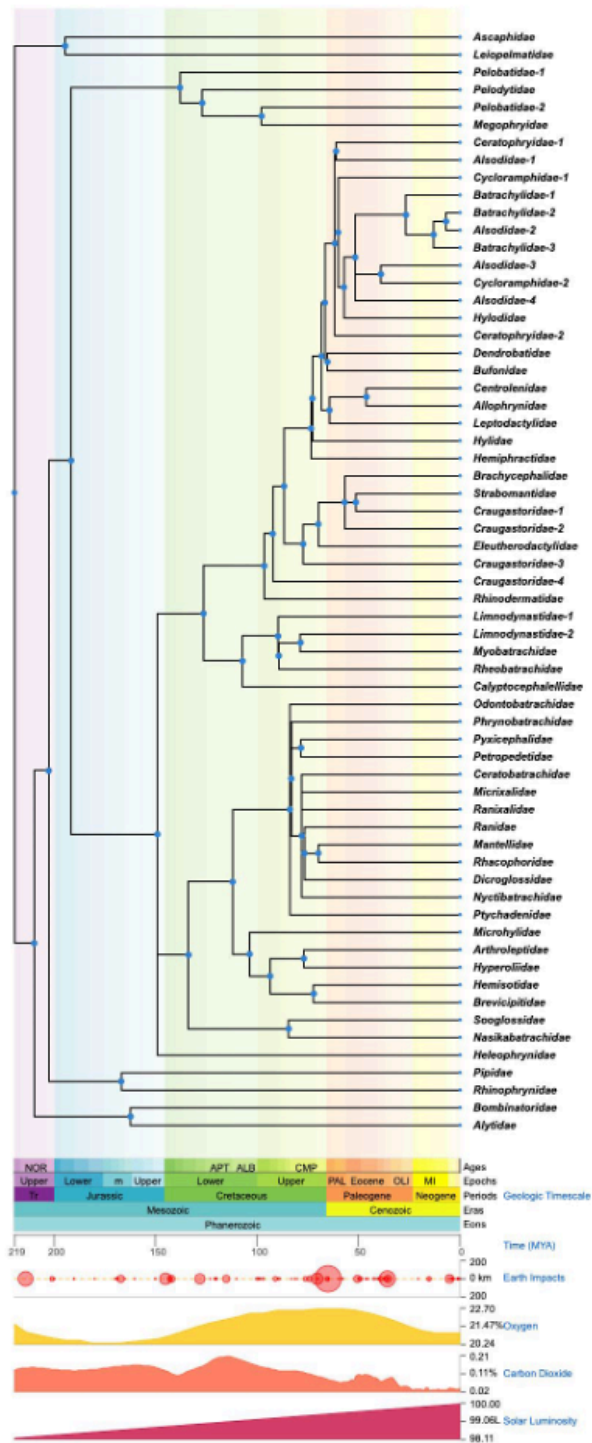

**Figure S1:** Time calibrated anuran family tree generated from [Timetree.org](https://timetree.org/).

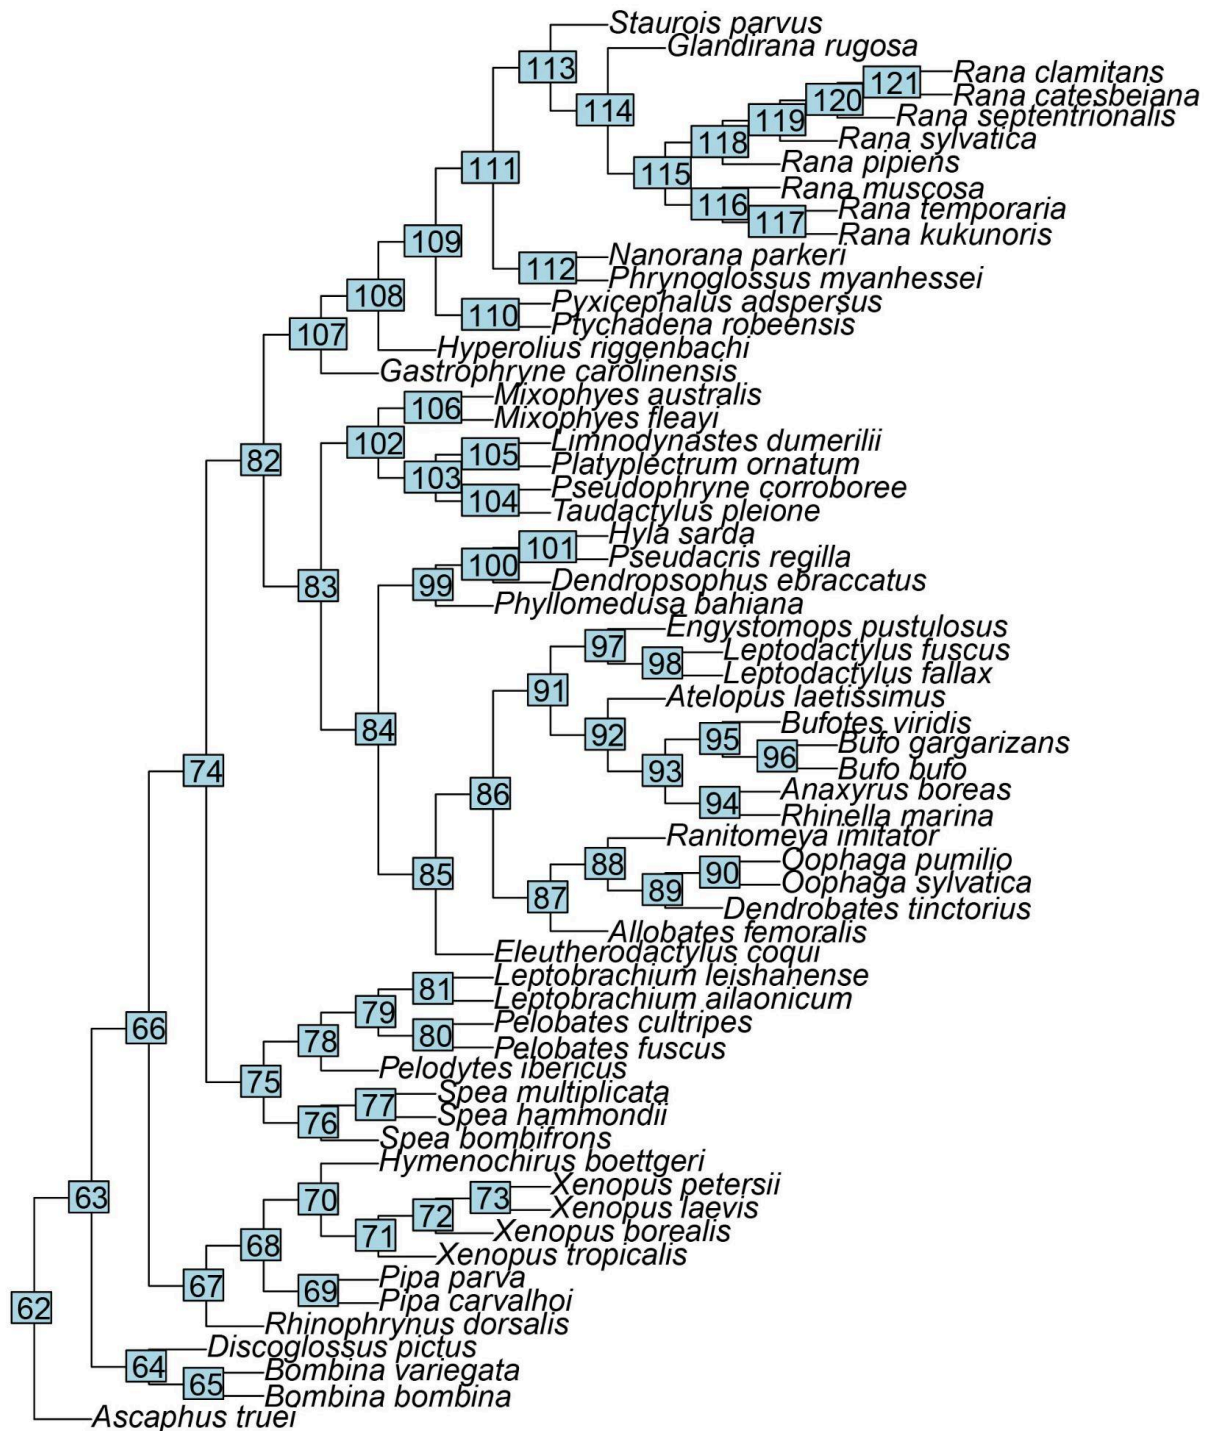

**Figure S2.** Anuran phylogeny with labeled nodes for reference in comparing overlapping confidence intervals for ancestral character state estimates (see Supplementary Table XX). All branch lengths set to 1 to highlight tree branching.

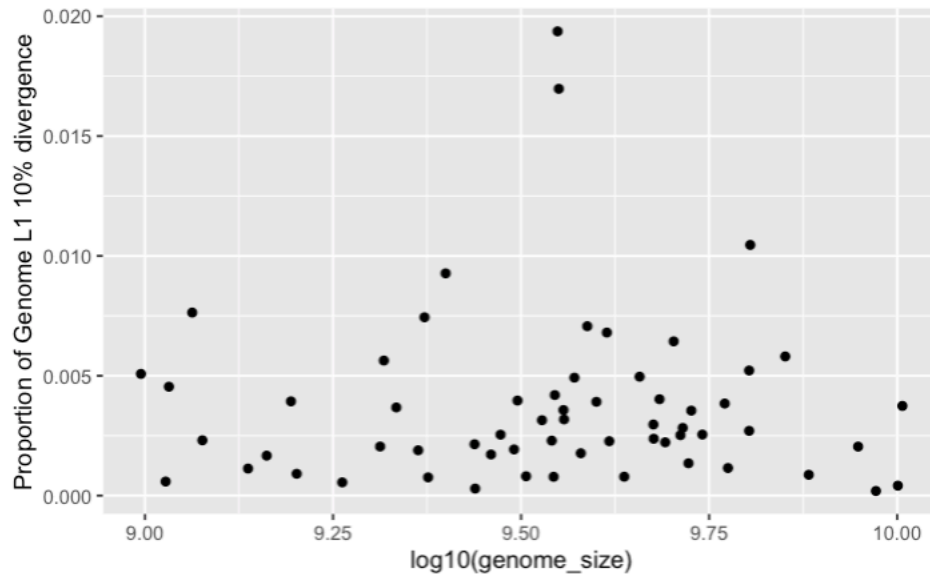

**Figure S3:** Relationship between proportion of amphibian genome composed of recently active L1 elements and genome size. Elements were considered recently active if the integrated genome sequence had less than 10% divergence from L1 RepeatModeler consensus sequences. Each point represents the per species genome proportion composed of recently active L1 elements (OLS regression p-value=0.95).

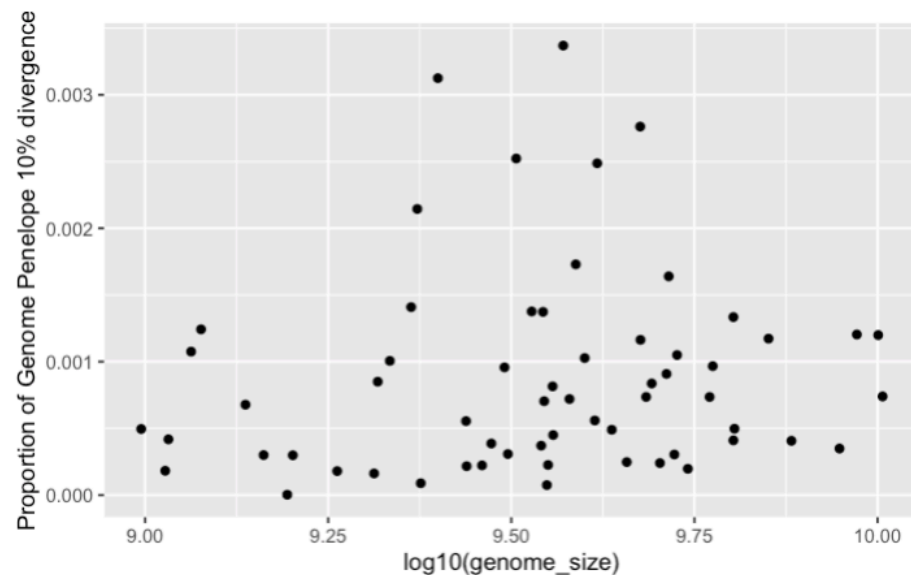

**Figure S4:** Relationship between proportion of amphibian genome composed of recently active Penelope elements and genome size. Elements were considered recently active if the integrated genome sequence had less than 10% divergence from Penelope RepeatModeler consensus sequences. Each point represents the per species genome proportion composed of recently active Penelope elements (OLS regression p-value = 0.37).

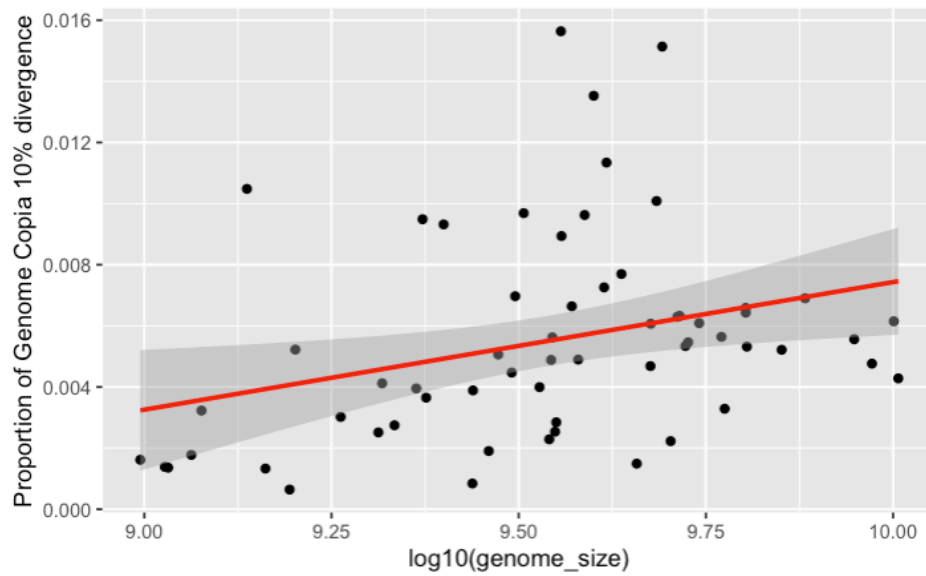

**Figure S5:** Relationship between proportion of amphibian genome composed of recently active Copia elements and genome size. Elements were considered recently active if the integrated genome sequence had less than 10% divergence from Copia RepeatModeler consensus sequences. Each point represents the per species genome proportion composed of recently active Copia elements (OLS regression p-value = 0.01,  $R^2=0.09$ ,  $\beta=0.004$ ).
